# Supplementary material for: Identification of Mortalin as the Main Interactor of Mycalin A, a Poly-Brominated C-15 Acetogenin Sponge Metabolite, by MS-Based Proteomics
Source: MDPI journal article supplement (doi:10.3390/md22020052), 2024-01-23
Supplement: s1 [file s1]

# Identification of Mortalin as the Main Interactor of Mycalin A, a Poly-Brominated C-15 Acetogenin Sponge Metabolite, by MS-Based Proteomics

Elva Morretta <sup>1,†</sup>, Alessandra Capuano <sup>1,2,†</sup>, Gilda D'Urso <sup>1</sup>, Antonia Voli <sup>1,2</sup>, Matteo Mozzicafreddo <sup>3</sup>, Sonia Di Gaetano <sup>4</sup>, Domenica Capasso <sup>5</sup>, Marina Sala <sup>1</sup>, Maria Carmina Scala <sup>1</sup>, Pietro Campiglia <sup>1</sup>, Vincenzo Piccialli <sup>6,\*</sup> and Agostino Casapullo <sup>1,\*</sup>

<sup>1</sup> Department of Pharmacy, University of Salerno, 84084 Fisciano, Italy; emorretta@unisa.it (E.M.); acapuano@unisa.it (A.C.); gidurso@unisa.it (G.D.); avoli@unisa.it (A.V.); msala@unisa.it (M.S.); mscala@unisa.it (M.C.S.); pcampiglia@unisa.it (P.C.)

<sup>2</sup> PhD Program in Drug Discovery and Development, University of Salerno, 84084 Fisciano, Italy

<sup>3</sup> Department of Clinical and Molecular Sciences, Marche Polytechnic University, 60126 Ancona, Italy; m.mozzicafreddo@univpm.it (M.M.)

<sup>4</sup> Institute of Biostructures and Bioimaging, Consiglio Nazionale delle Ricerche, Via Pietro Castellino 111, 80131 Napoli, Italy; sonia.digaetano@cnr.it (S.D.G.)

<sup>5</sup> Department of Physics, Ettore Pancini, University of Naples "Federico II", Via Cintia 21, 80126 Naples, Italy; domenica.capasso@unina.it (D.C.)

<sup>6</sup> Department of Chemical Sciences, University of Naples "Federico II", Via Cintia 21, 80126 Naples, Italy

\* Correspondence: vinpicci@unina.it (V.P.); casapullo@unisa.it (A.C.)

† These authors contributed equally to this work.

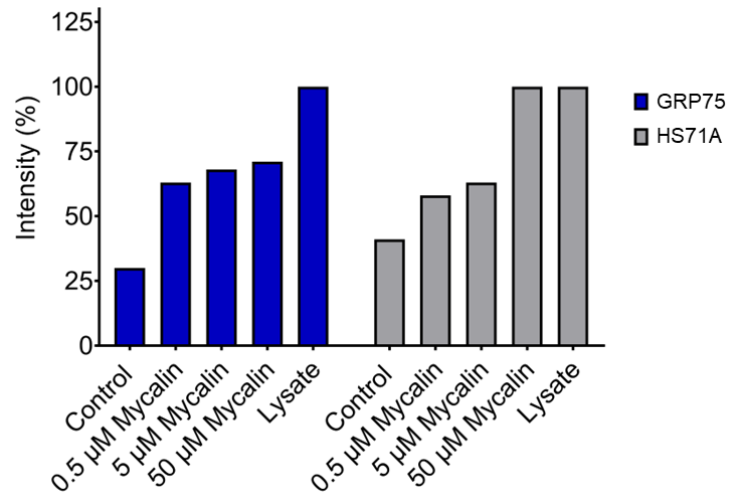

**Figure S1** Densitometric analysis of the Western Blots analysis of DARTS experiments

Densitometric analysis of the Western Blots experiments was performed through ImageJ on the full-length GRP75 signals (blue bars) and on the HS71A ones (gray bars). Increasing MA concentrations protect both Hsp70 isoforms accordingly.

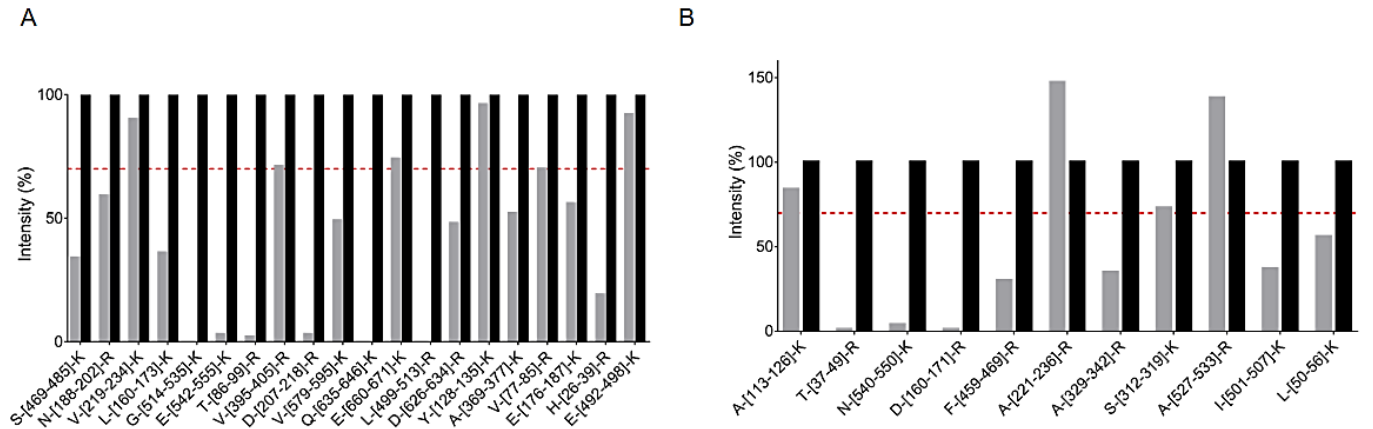

**Figure S2** GRP75 and HS71A fully tryptic peptides areas in the t-LiP experiment

GRP75 (A) and HS71A (B) fully tryptic peptides areas of the negative (i.e., DMSO and subtilisin treated sample, gray bars) and positive (i.e., DMSO treated and subtilisin unexposed sample, black bars) controls, reported as percentages of the latter sample.

Negative control peptides whose intensity is higher than the 70% of the corresponding positive control ones are those whose (gray) bars exceed the red dashed lines in both graphs. Mapping for GRP75 and HS71A regions not affected by subtilisin, these peptides were not considered for the subsequent data analysis step.

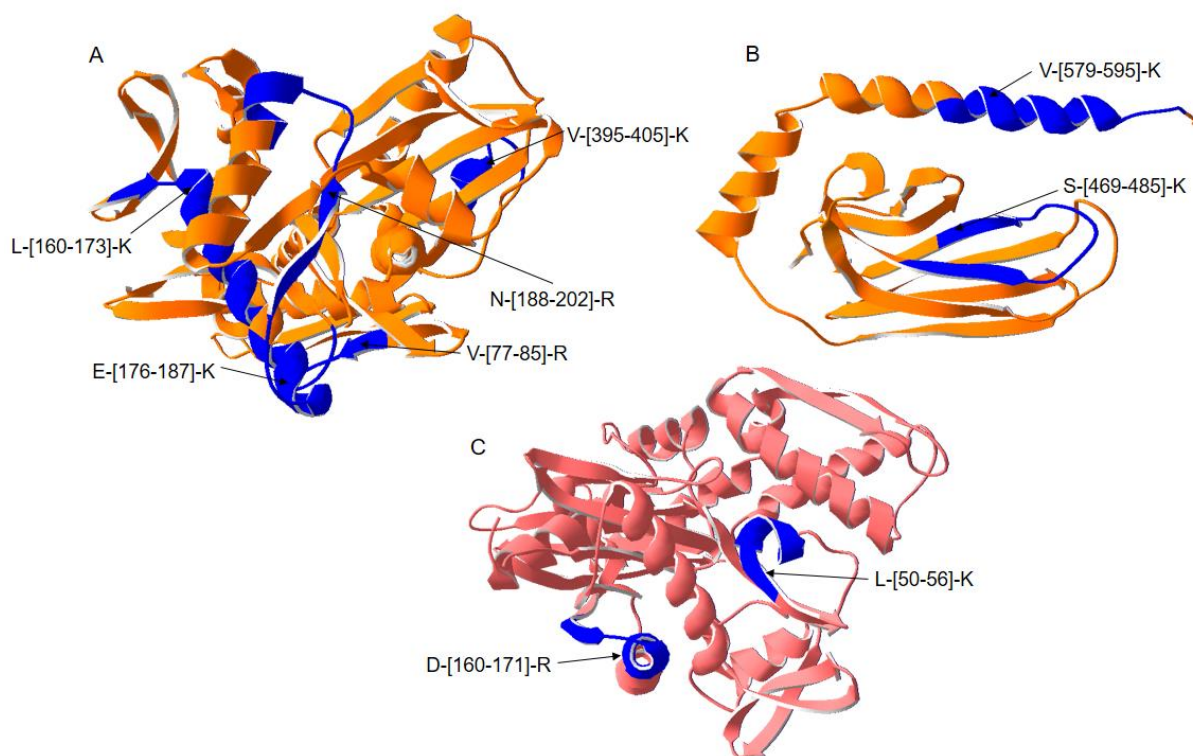

**Figure S3** Sticks and ribbons representation of GRP75 NBD and SBD and of HS71A NBD

Sticks and ribbons representation of GRP75 NBD (A) and SBD (B) and of HS71A NBD (C). MA protected peptides identified through t-LiP-MS are depicted in blue and indicated with the corresponding identifiers. As can be observed in panels A and B, GRP75 peptides all map for the same NBD and SBD regions, suggesting an important conformational change following MA binding and, therefore, a minor sensitivity to subtilisin proteolytic action. The only exception to this trend is the NBD V-[395-405]-K, which lies far from the other peptides.

Regarding HS71A NBD, as can be observed in panel C, the two identified protected peptides do not seem to be close to one another, but they face the same  $\alpha$ -helix.

**Table S1** List of proteins identified in two independent DARTS experiments, reported with their Mascot Score and Matches.

| Accession | Mass   | Description                                | DARTS 1 |         |           |         |         |         |          |         |        |         | DARTS 2 |         |           |         |         |         |          |         |        |         |
|-----------|--------|--------------------------------------------|---------|---------|-----------|---------|---------|---------|----------|---------|--------|---------|---------|---------|-----------|---------|---------|---------|----------|---------|--------|---------|
|           |        |                                            | Control |         | 0.5 μM MA |         | 5 μM MA |         | 50 μM MA |         | Lysate |         | Control |         | 0.5 μM MA |         | 5 μM MA |         | 50 μM MA |         | Lysate |         |
|           |        |                                            | Score   | Matches | Score     | Matches | Score   | Matches | Score    | Matches | Score  | Matches | Score   | Matches | Score     | Matches | Score   | Matches | Score    | Matches | Score  | Matches |
| P17655    | 80 800 | Calpain-2 catalytic subunit                | 0       | 0       | 0         | 0       | 0       | 0       | 0        | 0       | 96     | 4       | 0       | 0       | 0         | 0       | 0       | 0       | 106      | 5       | 203    | 6       |
| P54136    | 76 129 | Arginine--tRNA ligase, cytoplasmic         | 0       | 0       | 33        | 2       | 0       | 0       | 68       | 1       | 226    | 4       | 310     | 8       | 311       | 6       | 392     | 10      | 529      | 17      | 786    | 22      |
| P38646    | 73 920 | Stress-70 protein, mitochondrial           | 465     | 10      | 702       | 16      | 773     | 21      | 1281     | 25      | 1147   | 32      | 820     | 25      | 1167      | 34      | 1289    | 35      | 1519     | 44      | 1977   | 53      |
| P11142    | 71 082 | Heat shock cognate 71 kDa protein          | 2973    | 84      | 3424      | 107     | 2723    | 75      | 1920     | 44      | 3350   | 97      | 4074    | 119     | 3435      | 99      | 4489    | 131     | 5868     | 163     | 6375   | 181     |
| P0DMV8    | 70 294 | Heat shock 70 kDa protein 1A               | 0       | 0       | 0         | 0       | 0       | 58      | 2        | 430     | 9      | 530     | 15      | 705     | 21        | 1066    | 29      | 1423    | 43       | 1270    | 47     |         |
| P12956    | 70 084 | X-ray repair cross-complementing protein 6 | 0       | 0       | 256       | 17      | 111     | 11      | 0        | 0       | 486    | 29      | 1442    | 60      | 2013      | 81      | 1770    | 78      | 1907     | 79      | 2266   | 91      |
| O60506    | 69 788 | Heterogeneous nuclear ribonucleoprotein Q  | 114     | 2       | 171       | 3       | 385     | 9       | 0        | 0       | 195    | 5       | 0       | 0       | 0         | 0       | 0       | 0       | 0        | 0       | 97     | 4       |
| P15311    | 69 484 | Ezrin                                      | 119     | 4       | 0         | 0       | 48      | 3       | 0        | 0       | 296    | 15      | 0       | 0       | 215       | 14      | 0       | 0       | 452      | 23      | 1098   | 41      |
| P29401    | 68 519 | Transketolase                              | 334     | 5       | 0         | 0       | 361     | 8       | 565      | 13      | 1815   | 51      | 3061    | 89      | 4435      | 122     | 3655    | 116     | 4324     | 151     | 3977   | 112     |
| Q15046    | 68 461 | Lysine--tRNA ligase                        | 0       | 0       | 0         | 0       | 0       | 0       | 0        | 0       | 157    | 6       | 0       | 0       | 0         | 0       | 0       | 0       | 114      | 3       | 385    | 15      |
| P26038    | 67 892 | Moesin                                     | 0       | 0       | 194       | 7       | 0       | 0       | 0        | 0       | 646    | 24      | 98      | 3       | 423       | 16      | 230     | 11      | 546      | 23      | 1426   | 56      |
| P17987    | 60 819 | T-complex protein 1 subunit alpha          | 33      | 2       | 0         | 0       | 0       | 0       | 0        | 0       | 129    | 6       | 0       | 0       | 78        | 5       | 498     | 20      | 30       | 5       | 654    | 23      |
| P48643    | 60 089 | T-complex protein 1 subunit epsilon        | 286     | 6       | 324       | 4       | 179     | 8       | 0        | 0       | 837    | 14      | 0       | 0       | 901       | 22      | 1350    | 41      | 614      | 20      | 1141   | 37      |
| Q99832    | 59 842 | T-complex protein 1 subunit eta            | 0       | 0       | 0         | 0       | 0       | 0       | 0        | 0       | 691    | 12      | 0       | 0       | 471       | 11      | 911     | 26      | 119      | 3       | 1373   | 39      |
| P25705    | 59 828 | ATP synthase subunit alpha, mitochondrial  | 230     | 5       | 68        | 1       | 320     | 6       | 0        | 0       | 419    | 11      | 0       | 0       | 0         | 0       | 0       | 0       | 128      | 5       | 363    | 11      |
| P11413    | 59 675 | Glucose-6-phosphate 1-dehydrogenase        | 0       | 0       | 0         | 0       | 81      | 5       | 0        | 0       | 156    | 9       | 0       | 0       | 0         | 0       | 0       | 0       | 0        | 0       | 18     | 3       |
| P40227    | 58 444 | T-complex protein 1 subunit zeta           | 185     | 14      | 82        | 9       | 113     | 6       | 114      | 6       | 1067   | 23      | 318     | 10      | 817       | 24      | 1533    | 43      | 1039     | 34      | 1808   | 58      |
| P50991    | 58 401 | T-complex protein 1 subunit delta          | 191     | 9       | 0         | 0       | 0       | 0       | 0        | 0       | 701    | 25      | 0       | 0       | 231       | 12      | 513     | 20      | 0        | 0       | 1211   | 41      |
| P78371    | 57 794 | T-complex protein 1 subunit beta           | 123     | 5       | 68        | 1       | 0       | 0       | 0        | 0       | 1069   | 22      | 0       | 0       | 93        | 1       | 586     | 15      | 0        | 0       | 1026   | 30      |
| O43175    | 57 356 | D-3-phosphoglycerate dehydrogenase         | 479     | 13      | 269       | 9       | 415     | 13      | 101      | 8       | 567    | 18      | 0       | 0       | 0         | 0       | 532     | 17      | 529      | 15      | 812    | 24      |
| P23381    | 53 474 | Tryptophan--tRNA ligase, cytoplasmic       | 0       | 0       | 0         | 0       | 0       | 0       | 0        | 0       | 445    | 13      | 0       | 0       | 0         | 0       | 14      | 2       | 56       | 1       | 791    | 19      |
| Q01518    | 52 325 | Adenylyl cyclase-associated protein 1      | 100     | 4       | 0         | 0       | 0       | 0       | 0        | 0       | 444    | 17      | 0       | 0       | 0         | 0       | 259     | 12      | 0        | 0       | 956    | 34      |
| P55209    | 45 631 | Nucleosome assembly protein 1-like 1       | 49      | 4       | 0         | 0       | 146     | 5       | 0        | 0       | 357    | 11      | 0       | 0       | 0         | 0       | 31      | 1       | 0        | 0       | 369    | 11      |

The list was obtained removing subtilisin-undigested proteins (i.e.,  $\text{Matches}_{\text{Control}} \geq \text{Matches}_{\text{Lysate}}$ ) and proteins that were not identified in MA-treated samples in both DARTS replicates. As can be observed, the mitochondrial stress-70 protein (referred to as GRP75 in the main text) and the cytosolic Heat shock 70 kDa protein A1 (referred to as HS71A in the main text) score and matches increase when increasing MA amounts were incubated with the HeLa lysates prior to subtilisin limited proteolysis. Control: DMSO and subtilisin treated sample, or negative control in the main text. Lysate: DMSO-treated and undigested sample or positive control in the main text.

**Table S2** GRP75 and HS71A fully tryptic peptides analyzed through t-LiP-MS

| Q1_m/z | Q3_m/z  | Retention Time (min) | GRP75                      |               | HS71A            |               |
|--------|---------|----------------------|----------------------------|---------------|------------------|---------------|
|        |         |                      | Sequence                   | Peptide       | Sequence         | Peptide       |
| 421.7  | 322.19  | 4.86                 | HQDSWNGLSHEAFR             | H-[26-39]-R   | -                | -             |
| 479.75 | 746.34  | 2.61                 | VLENAEGAR                  | V-[77-85]-R   | -                | -             |
| 725.86 | 866.4   | 8.2                  | TTPSWAFTADGER              | T-[86-99]-R   | -                | -             |
| 497.23 | 745.36  | 24.84                | YDDPEVQK                   | Y-[128-135]-K | -                | -             |
| 777.42 | 278.15  | 11.71                | LYSPSQIGAFVLMK             | L-[160-173]-K | -                | -             |
| 445.22 | 513.28  | 5.63                 | ETAENYLGHITAK              | E-[176-187]-K | -                | -             |
| 847.93 | 1097.5  | 9.65                 | NAVITVPAYFNDSSQR           | N-[188-202]-R | -                | -             |
| 621.84 | 758.45  | 8.93                 | DAGQISGLNVLR               | D-[207-218]-R | -                | -             |
| 823.44 | 666.35  | 22.28                | VINEPTAAALAYGLDK           | V-[219-234]-K | -                | -             |
| 489.73 | 234.15  | 22.15                | AMQDAEVSK                  | A-[369-377]-K | -                | -             |
| 645.84 | 1063.55 | 8.66                 | VQQTVDLFGK                 | V-[395-405]-R | -                | -             |
| 904.96 | 902.49  | 7.51                 | SQVFSTAADGGTQVEIK          | S-[469-485]-K | -                | -             |
| 382.67 | 264.46  | 5.02                 | EMAGDNK                    | E-[482-498]-K | -                | -             |
| 531.66 | 269.16  | 12.23                | LLGQFTLIGIPPAPR            | L-[499-513]-R | -                | -             |
| 770.41 | 305.18  | 9.98                 | GVPQIEVTFDIDANGIVHM<br>SAK | G-[514-535]-K | -                | -             |
| 737.4  | 876.48  | 9.56                 | EQQIVQSSGGLSK              | E-[542-555]-K | -                | -             |
| 619.64 | 672.83  | 10.3                 | VEAVNMAEGIIHDTETK          | V-[579-595]-K | -                | -             |
| 510.73 | 689.36  | 5.48                 | DSETGENIR                  | D-[626-634]-R | -                | -             |
| 616.34 | 674.38  | 10.89                | QAASSLQQASLK               | Q-[635-646]-K | -                | -             |
| 582.25 | 275.17  | 21.96                | EGSGSSGTGEQK               | E-[660-671]-K | -                | -             |
| 744.35 | 643.31  | 8.02                 | -                          | -             | TTPSYVAFTDTER    | T-[37-49]-R   |
| 344.21 | 218.15  | 1.3                  | -                          | -             | LIGDAK           | L-[50-56]-K   |
| 807.91 | 248.16  | 22.35                | -                          | -             | AFYPEEISSMVLTK   | A-[113-126]-K |
| 599.35 | 742.46  | 9.56                 | -                          | -             | DAGVIAGLNVLR     | D-[160-171]-R |
| 569.25 | 272.47  | 4.66                 | -                          | -             | ATAGDTHLGGEDFDNR | A-[221-236]-R |
| 451.75 | 375.22  | 7.29                 | -                          | -             | STLEPVEK         | S-[312-319]-K |
| 489.28 | 288.66  | 4.78                 | -                          | -             | AQIHDLVLVGGSTR   | A-[329-342]-R |
| 592.33 | 537.34  | 9.07                 | -                          | -             | FELSGIPPAPR      | F-[469-469]-R |
| 402.73 | 376.18  | 5.85                 | -                          | -             | ITITNDK          | I-[501-507]-K |
| 423.7  | 204.63  | 6.24                 | -                          | -             | AEDEVQR          | A-[627-633]-R |
| 644.31 | 989.44  | 9.2                  | -                          | -             | NALESYAFNMK      | N-[540-550]-K |

Each peptide is reported with its precursor m/z value (i.e., Q1\_m/z), its best daughter ion m/z value (i.e., Q3\_m/z) and the corresponding retention time, sequence, and identifier (i.e., *Peptide* columns in the table). Q3\_m/z and retention times were assigned analyzing a HeLa tryptic digest through previous MRM methods consisting of three transitions for each precursor. Thus, the extracted ion currents (i.e., XICs) of all the transitions for each precursor were inspected to assign them the corresponding retention times (same precursor = same retention time for all the daughter ions) and subsequently select the best daughter ion as the one giving the highest signal and the lowest noise level.

Crossed rows indicate peptides whose area in the negative control was higher than the 70% of the corresponding positive control one, as reported in the subsequent figure.
